# Supplementary material for: Single-molecule electrochemical imaging of ‘split waves’ in the electrocatalytic (EC′) mechanism
Source: Royal Society of Chemistry journal article supplement (doi:10.1039/d4fd00126e), 2024-07-06
Supplement: d4fd00126e1.pdf [file d4fd00126e1.pdf]

*Supplementary Information for*

**Single-molecule electrochemical imaging of 'split waves' in the  
electrocatalytic (EC') mechanism**

Wandong Zhao<sup>a</sup>, Jin Lu\*<sup>a,b</sup>

<sup>a</sup>CAS Key Laboratory for Biomedical Effects of Nanomaterials and Nanosafety, National Center for Nanoscience and Technology, Beijing 100190, P. R. China

<sup>b</sup>University of Chinese Academy of Sciences, Beijing 100049, P. R. China

E-mail: [luj@nanoctr.cn](mailto:luj@nanoctr.cn)

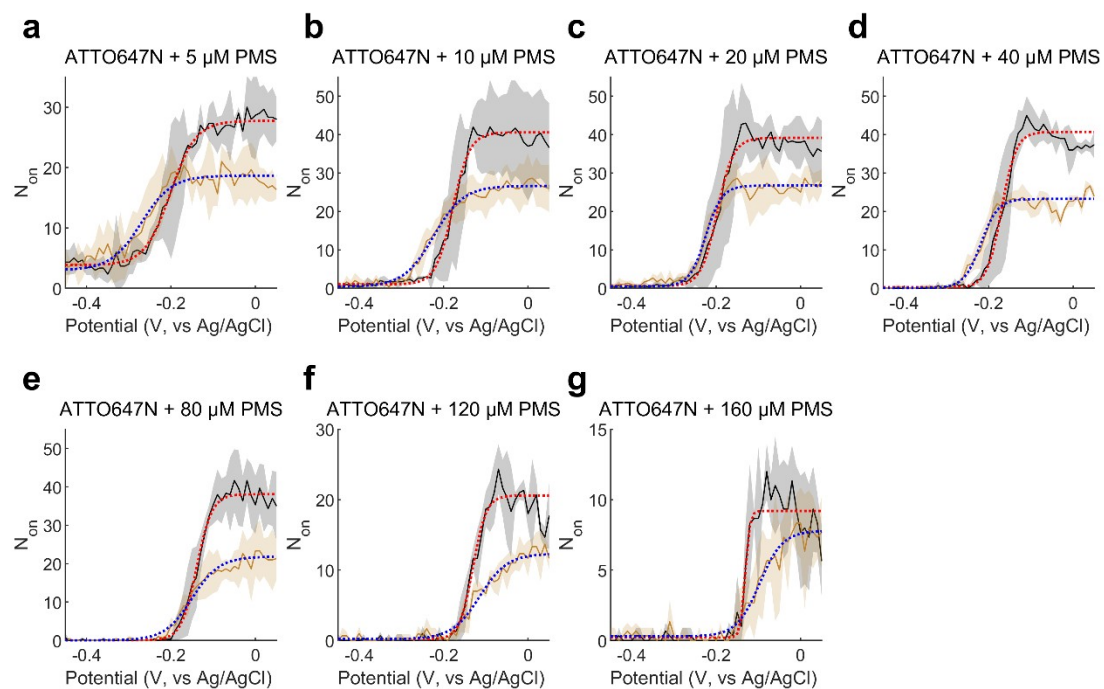

Fig. S1 Sigmoid curve ( $f(x) = \frac{a}{1 + \exp(-k * (x - E))} + d$ , where  $E$  is the midpoint potential) fitting of single-molecule number ( $N_{on}$ ) trajectories shown in Figure 2. (a) 5  $\mu$ M PMS, (b) 10  $\mu$ M PMS, (c) 20  $\mu$ M PMS, (d) 40  $\mu$ M PMS, (e) 80  $\mu$ M PMS, (f) 120  $\mu$ M PMS, and (g) 160  $\mu$ M PMS. Red dotted line: fitting to the forward scan (black); blue dotted line: fitting to the reverse scan (dark yellow).
